# Supplementary material for: PD-L1-Targeted Co-Delivery of Two Chemotherapeutics for Efficient Suppression of Skin Cancer Growth
Source: MDPI journal article supplement (doi:10.3390/pharmaceutics14071488), 2022-07-18
Supplement: s1 [file s1]

## **Additional file 1**

### **PD-L1-targeted co-delivery of two chemotherapeutics for synergistic suppression of skin cancer in vitro and in vivo**

Fatemeh Movahedi, Jie Liu, Bing Sun, Pei Cao, Luyao Sun, Christopher Howard, Wenyi Gu,  
and Zhi Ping Xu\*

Australian Institute for Bioengineering and Nanotechnology (AIBN), The University of  
Queensland, St Lucia, QLD 4072, Australia

\* Corresponding authors. Email: [gordonxu@uq.edu.au](mailto:gordonxu@uq.edu.au); Tel: 61 7 33463809

### Determination of the number of conjugates

Briefly, the total number of lipid molecules in the outer lipid layer of each LCP was estimated by Equation 1:

$$N_{lip} = \frac{4\pi(r+h)^2}{a} \quad (\text{Equation 1})$$

where  $r$  is the radius of CaP core,  $h$  is the thickness of lipid layer (taken as 5 nm) and  $a$  is the average area per lipid molecule (0.7 nm<sup>2</sup> for DOPC). Then, the number of LCP NPs per ml was calculated by Equation 2:

$$N_{LCP} = \frac{C_{lip} \times NA}{N_{lip} \times 1000} \quad (\text{Equation 2})$$

where  $C_{lip}$  is the molar concentration of DOPC, and  $NA$  is the Avogadro number. Finally, the number of PD-L1 antibody of folic acid ligands per LCP NP were determined by Equation 3:

$$N_{lig} = \frac{C_{lig} \times N_{lip}}{C_{lip}} \quad (\text{Equation 3})$$

where  $C_{lig}$  is the molar concentration of the ligand.

**Table S1.** List of synthesised NPs

| <b>Nanoparticle code</b> | <b>Payload</b> | <b>Number of FA<br/>per NP</b> | <b>Number of<br/>PD-L1 per<br/>NP</b> |
|--------------------------|----------------|--------------------------------|---------------------------------------|
| OTS-ABZ-LCP              | ABZ and OTS    | 0                              | 0                                     |
| Cy5-LCP                  | Cy5 dsDNA      | 0                              | 0                                     |
| Cy5-LCP-P40              | Cy5 dsDNA      | 0                              | 40                                    |
| Cy5-LCP-P80              | Cy5 dsDNA      | 0                              | 80                                    |
| Cy5-LCP-P160             | Cy5 dsDNA      | 0                              | 160                                   |
| OTS-ABZ-LCP-P40          | ABZ and OTS    | 0                              | 40                                    |
| OTS-ABZ-LCP-P80          | ABZ and OTS    | 0                              | 80                                    |
| OTS-ABZ-LCP-P160         | ABZ and OTS    | 0                              | 160                                   |
| OTS-ABZ-LCP-F50          | ABZ and OTS    | 50                             | 0                                     |
| OTS-ABZ-LCP-F100         | ABZ and OTS    | 100                            | 0                                     |
| OTS-ABZ-LCP-F200         | ABZ and OTS    | 200                            | 0                                     |
| OTS-ABZ-LCP-F50P40       | ABZ and OTS    | 50                             | 40                                    |
| OTS-ABZ-LCP-F50P80       | ABZ and OTS    | 50                             | 80                                    |
| OTS-ABZ-LCP-F50P160      | ABZ and OTS    | 50                             | 160                                   |
| OTS-ABZ-LCP-F100P40      | ABZ and OTS    | 100                            | 40                                    |
| OTS-ABZ-LCP-F100P80      | ABZ and OTS    | 100                            | 80                                    |
| OTS-ABZ-LCP-F100P160     | ABZ and OTS    | 100                            | 160                                   |

**Table S2.** The mean size of PD-L1/folic acid conjugated OTS-ABZ-LCPs

| <b>Sample name</b> | <b>Number<br/>mean size<br/>(nm)</b> | <b>Sample name</b>   | <b>Number<br/>mean size<br/>(nm)</b> |
|--------------------|--------------------------------------|----------------------|--------------------------------------|
| OTS-ABZ-LCP-F50    | 57.3                                 | OTS-ABZ-LCP-F100P40  | 66.0                                 |
| OTS-ABZ-LCP-F100   | 59.7                                 | OTS-ABZ-LCP-F100P80  | 65.5                                 |
| OTS-ABZ-LCP-F200   | 59.3                                 | OTS-ABZ-LCP-F100P160 | 65.3                                 |
| OTS-ABZ-LCP-P40    | 58.7                                 | OTS-ABZ-LCP-F50P40   | 64.7                                 |
| OTS-ABZ-LCP-P80    | 61.7                                 | OTS-ABZ-LCP-F50P80   | 62.4                                 |
| OTS-ABZ-LCP-P160   | 63.1                                 | OTS-ABZ-LCP-F50P160  | 63.2                                 |
| OTS-ABZ-LCP        | 58.0                                 |                      |                                      |

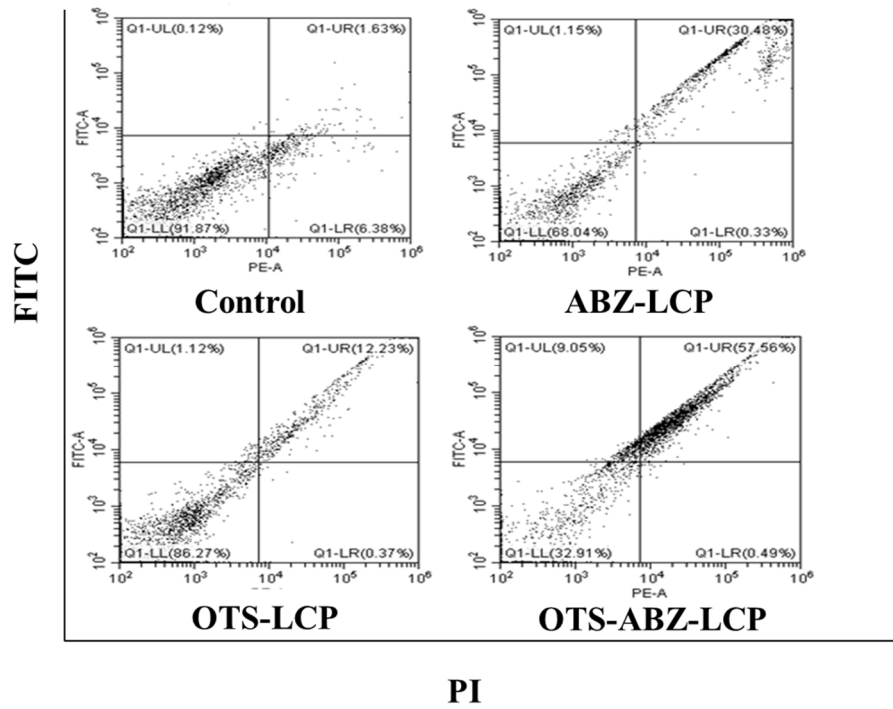

**Figure S1.** Annexin V-FITC/PI double staining analysis of apoptosis in B16F0 cells treated with ABZ-LCP, OTS-LCP and OTS-ABZ-LCP for 24 h (Annexin V and PI negative cells were considered as live, Annexin V positive and PI negative as early apoptotic, Annexin V and PI positive as late apoptotic and Annexin V negative and PI positive as necrotic cells).

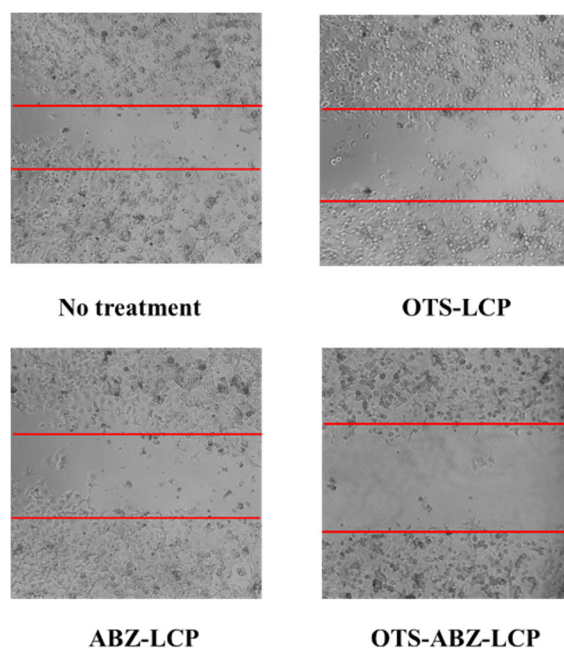

**Figure S2.** Relative migrated number of cells determined by wound healing assay for B16F0 cells treated with LCP formulations for 4 h. The equivalent concentration of ABZ and OTS was 2.5  $\mu\text{g/ml}$  and 64  $\text{ng/ml}$ , respectively.

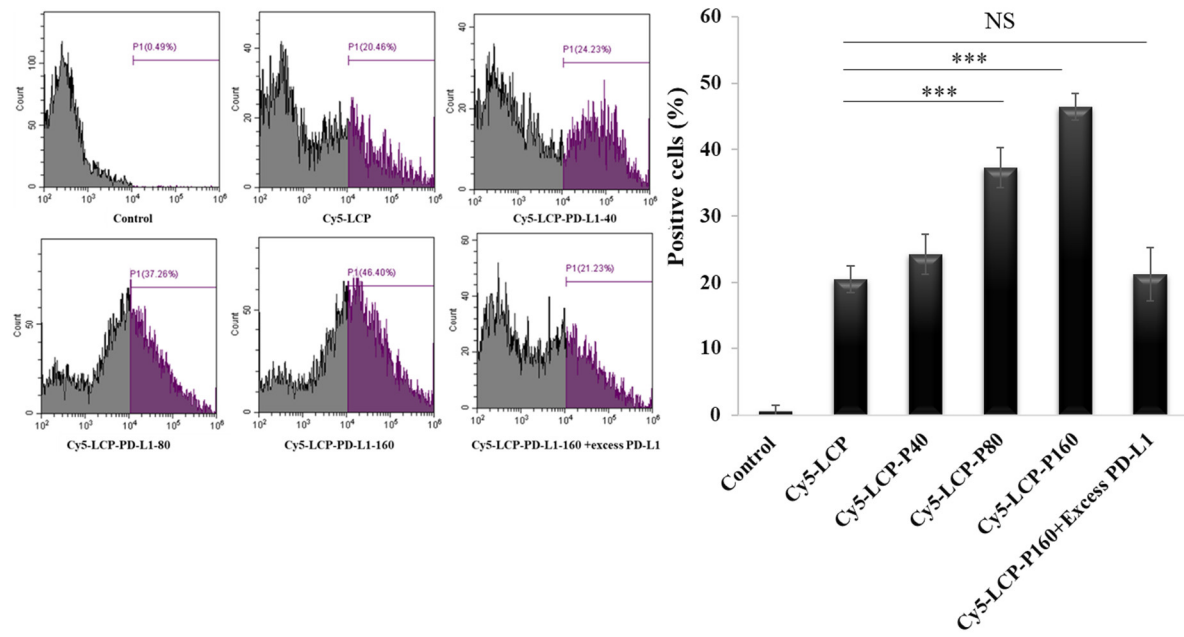

**Figure S3.** Cellular uptake of Cy5 dsDNA-loaded LCPs conjugated with 40, 80 or 160 PD-L1 antibodies per NP by B16F0 cells after 4 h.

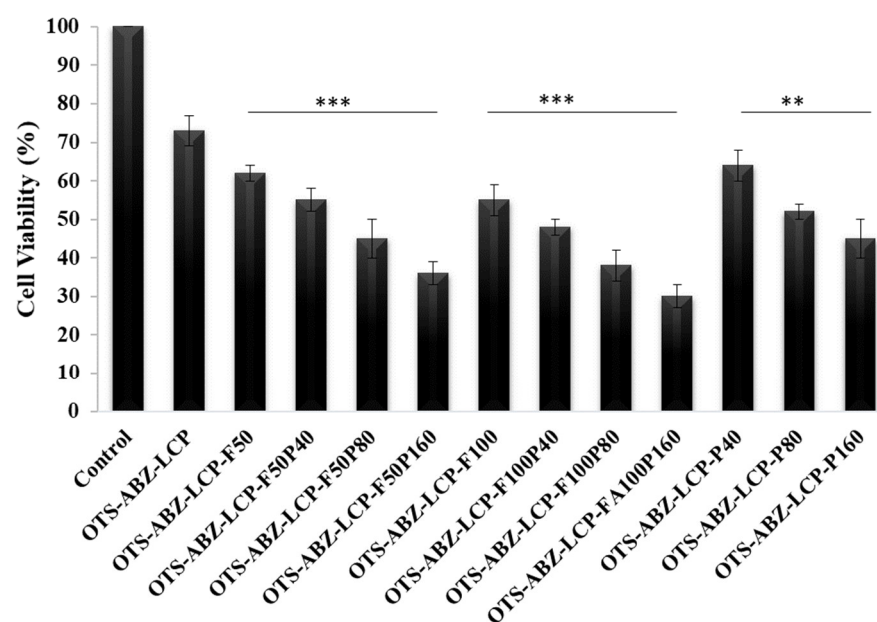

**Figure S4.** Cytotoxic effect of OTS-ABZ-LCP NPs dual conjugated with different numbers of folic acid and PD-L1 antibody (ABZ: 100 ng/ml; OTS964: 50 ng/ml).



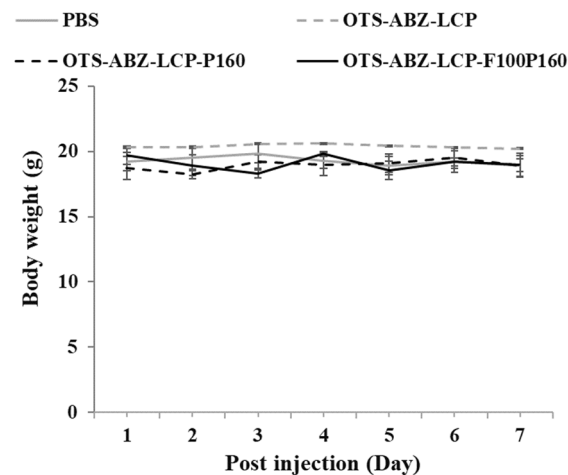

**Figure S5.** The average body weight of B16F0-bearing mouse treated with OTS-ABZ-LCP, OTS-ABZ-LCP-P160 and OTS-ABZ-LCP-F100P160 (equivalent amount of albendazole 2.5 mg/kg and 1 mg/kg OTS in all formulations) intraperitoneally injected 3 times every two days compared to that of PBS injection

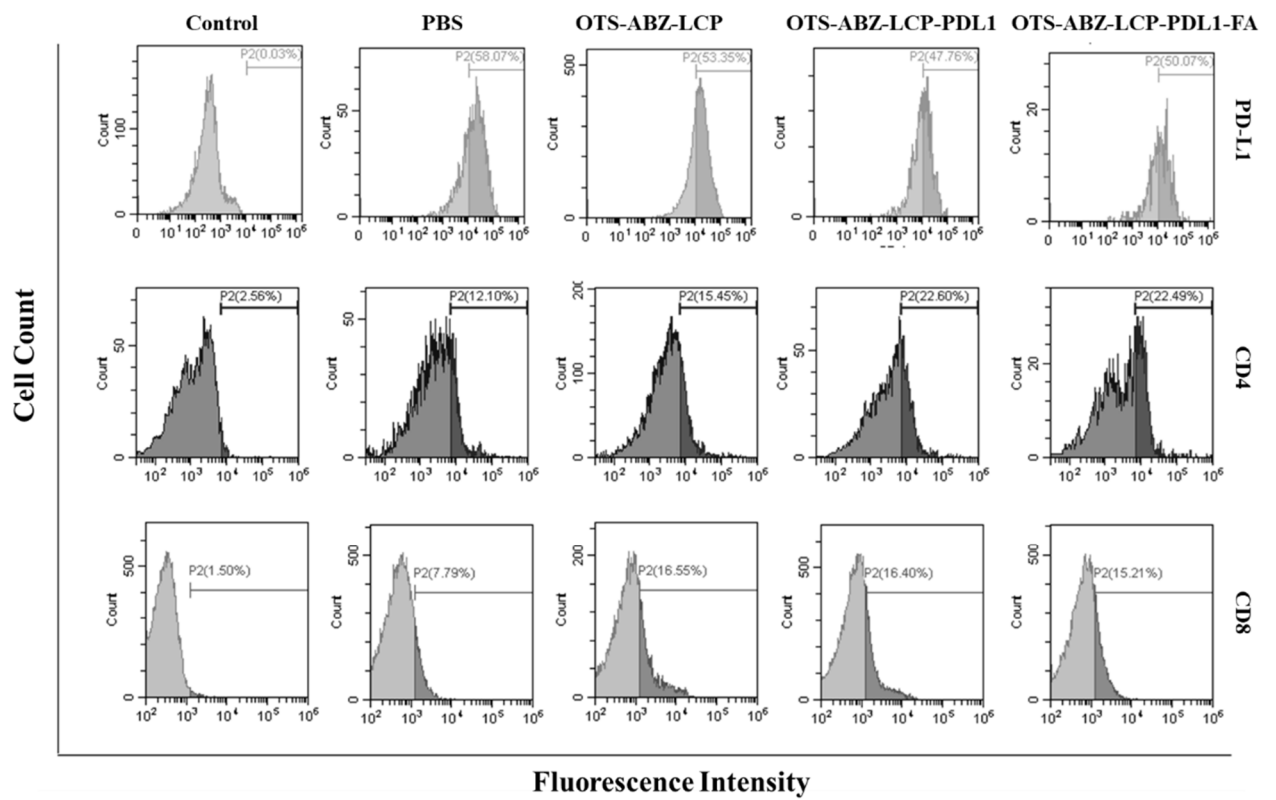

**Figure S6.** Flow cytometric analysis of PD-L1 expression, CD4<sup>+</sup> and CD8<sup>+</sup> in tumour population.

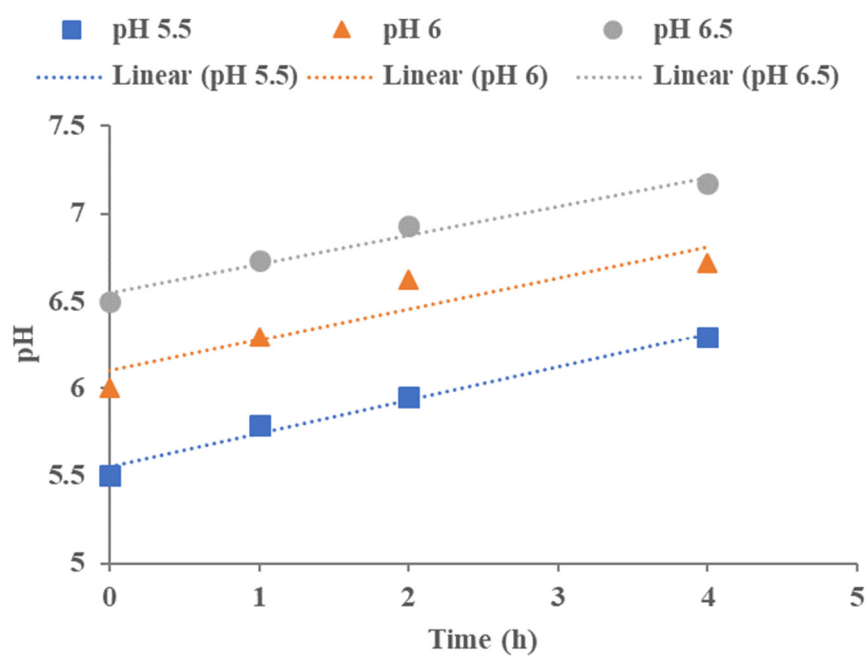

**Figure S7.** pH alteration by degradation of LCP NPs in DI water with set pH at 5.5, 6 and 6.5
